# Supplementary material for: Conformational regulation to realize modifiable ESIPT (excited-state intramolecular proton transfer) through intermolecular interactions
Source: Royal Society of Chemistry journal article supplement (doi:10.1039/d5qm00012b), 2025-01-01
Supplement: d5qm00012b1.pdf [file d5qm00012b1.pdf]

## Supporting Information

### **Conformational Regulations to Realize Modifiable ESIPT (Excited-State Intramolecular Proton Transfer) by Intermolecular Interactions**

Shao-Zhe Yi<sup>1</sup>, Bao-Ning Li<sup>1</sup>, Wen He<sup>1</sup>, Mei Pan\*<sup>1</sup>

<sup>a</sup> MOE Laboratory of Bioinorganic and Synthetic Chemistry, Lehn Institute of Functional Materials, IGCME, GBRCE for Functional Molecular Engineering, School of Chemistry, Sun Yat-Sen University, Guangzhou 510006 (China)

<sup>b</sup> School of Chemistry and Chemical Engineering, Yulin University, Yulin 719000 (China)

E-mail: [panm@mail.sysu.edu.cn](mailto:panm@mail.sysu.edu.cn)

## Experimental section

### Physical measurements and instrumentation

All reaction materials were obtained from commercial suppliers and used without further purification. Absorption spectra in the UV–visible region were recorded with a Shimadzu UV–3600 spectrophotometer, in a 10×1 mm or 10×10 mm quartz cell. The photoluminescence spectra were measured on Edinburgh Instruments FS 5 and FLS 980 fluorescence spectrophotometers. Time-dependent single-photon counting technology (picosecond to microsecond) and multi-channel scanning technology (microsecond to second) were used for decay lifetime acquisition, using FLS 980 fluorescence spectrophotometer with 369.6 nm laser light source. The absolute photoluminescence quantum yields (PLQYs) were measured using a Hamamatsu C9920-02G absolute photoluminescence quantum yield measurement system.

### Synthesis method and growth of single crystals

The parent molecule BDIBD was prepared according to our previous reports. BDIBD is dissolved in hot DMF/MeOH (v/v 1/10), acetone and MeOH, respectively. After cooling to room temperature, the needle crystals of complex are obtained by filtration, and dried under a vacuum. Three crystals named BDIBD-DMF, BDIBD-ACE, BDIBD-MeOH were synthesized.

### Crystal structure determination

Single-crystal diffraction data of molecules BDIBD-DMF, BDIBD-ACE and BDIBD-MeOH were collected on a Rigaku SuperNova X-ray diffractometer using micro-focus dual with X-ray Source of Cu-K $\alpha$  radiation ( $\lambda = 1.54178 \text{ \AA}$ ) at 240 K. Using Olex2, the structures were solved by SHELXT and refined using the full-matrix least-squares procedures within the SHELXTL software package. CCDC numbers **2169865**, **2402247**, **2402248** contain the supplementary crystallographic data, and can be obtained free of charge from the Cambridge Crystallographic Data Centre *via* [www.ccdc.cam.ac.uk/data\\_request/cif](http://www.ccdc.cam.ac.uk/data_request/cif).

### Computational Details

The density functional theory (DFT) was used to optimize the molecular structure in the ground state ( $S_0$ ), while the geometry of the excited states was optimized with the time dependent density functional theory (TD-DFT). To provide the different ES IPT mechanisms in crystals, we used the ONIOM(QM/MM) approach with a two-layer model, combining the quantum mechanical (TD)-M06-2X/6-31G(d,p) with the universal force field (UFF) force field. The clusters for ONIOM calculations were cut from the X-ray single-crystal structure in the experiment. One BDIBD molecule was placed at the center of the model and treated at the QM level, which was optimized

without constraint. The surrounding molecules were computed by low-level UFF force field with QEQ charges and kept frozen during optimizations. High layer was completely surrounded by Low layer. From the chemical structure of BDIBD, we can deduce that there should be two ES IPT-related hydrogen bonds in BDIBD, and thus two proton transfer states may exist. The molecule without proton transfer is labeled as BDIBD-enol. The molecule with one proton transferred is named BDIBD-keto<sup>1st</sup>. The molecules with two protons transferred is called BDIBD-keto<sup>2nd</sup>. The IR vibrational frequencies are calculated at the same theoretical level as the geometric optimization, with no imaginary frequencies observed, thus confirming the accuracy of the optimization and the stability of the structure. The LUMO, HOMO and electron & hole maps of QM part calculated at the same level were performed using Multiwfn program and VMD program. The reduced density gradient (RDG) and the atoms in molecules topology analysis (AIM) were performed in the same level. Ab initio molecular dynamics (AIMD) was studied for simulated complexes changes performed at using PBE0/def2-SV(P) with RIJCOSX approximation employing ORCA 5.0.4 package. Natural adaptive orbitals (NAoO) of molecules obtained by AIMD were performed by Multiwfn program.

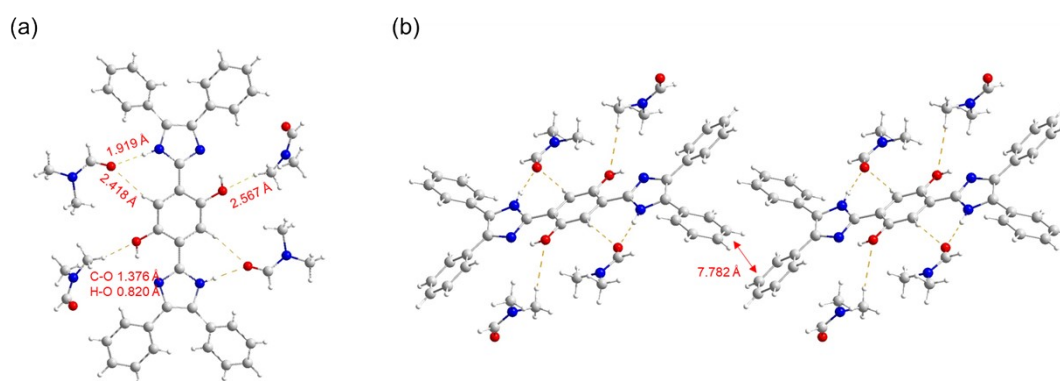

**Figure S1** Crystal structure and packing diagrams of BDIBD-DMF.

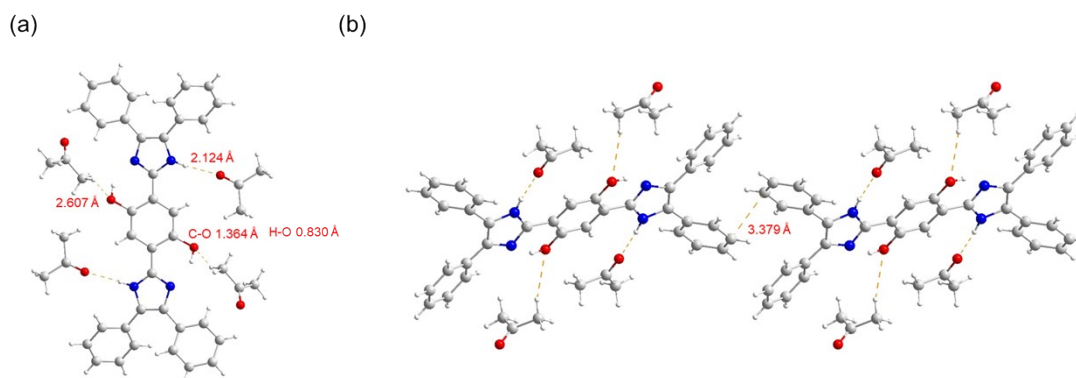

**Figure S2** Crystal structure and packing diagrams of BDIBD-ACE.

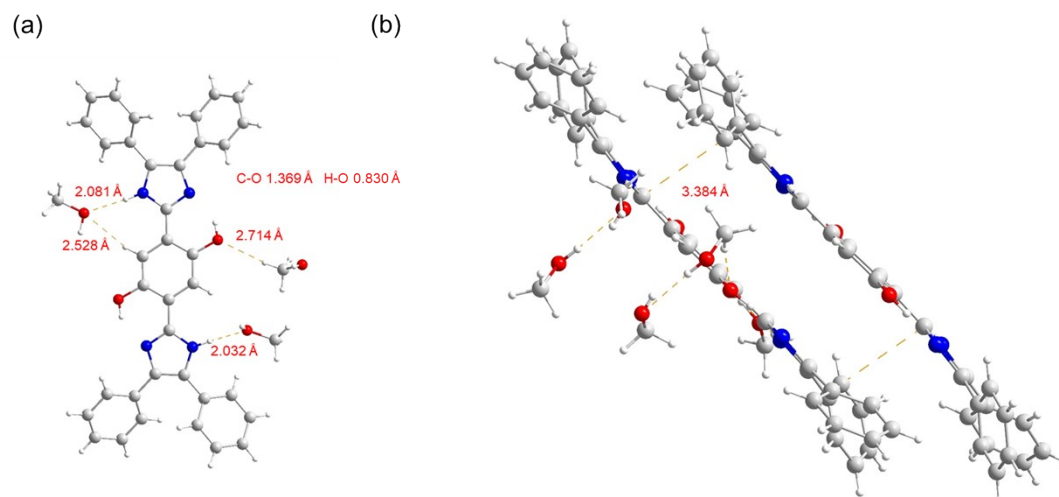

**Figure S3** Crystal structure and packing diagrams of BDIBD-MeOH.

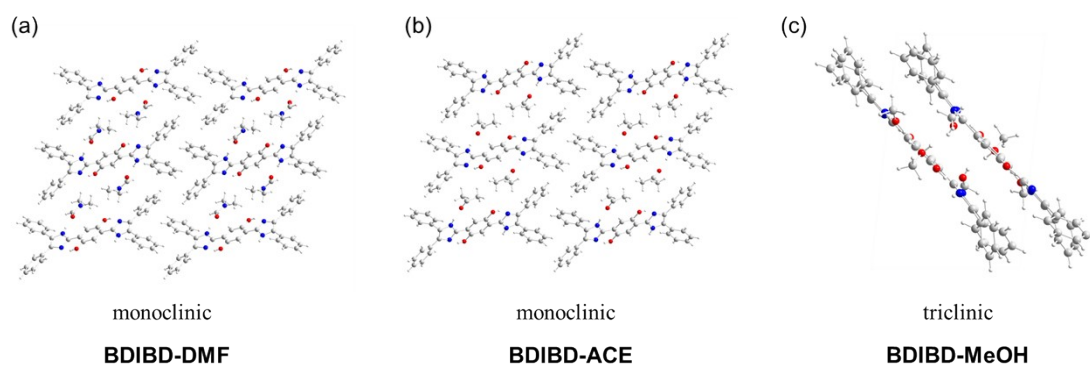

**Figure S4** Crystal cells of (a) BDIBD-DMF, (b) BDIBD-ACE and (c) BDIBD-MeOH viewed from direction b, respectively.

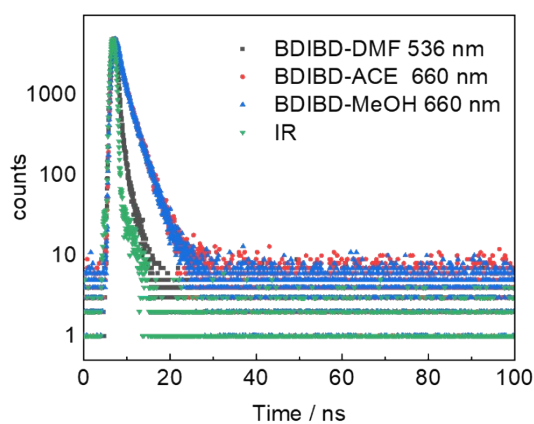

**Figure S5** The luminescence decay lifetime of the crystals.

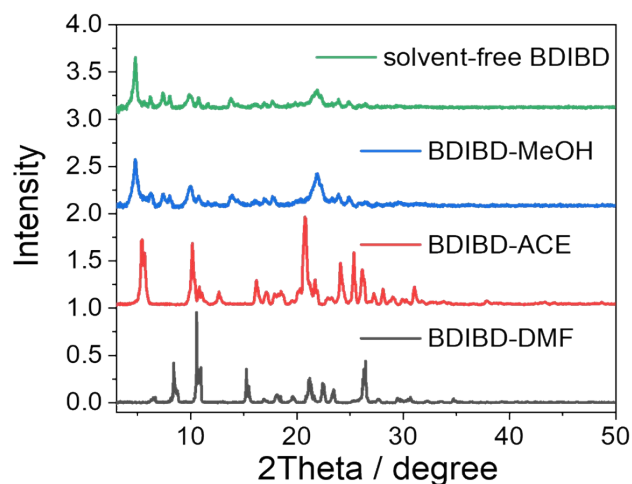

**Figure S6** Powder X-ray diffraction pattern of BDIBD-DMF, BDIBD-ACE, BDIBD-MeOH and solvent-free BDIBD. The solvent-free BDIBD molecule is obtained by heating BDIBD-DMF at 100°C for 72 hours to remove the solvent.

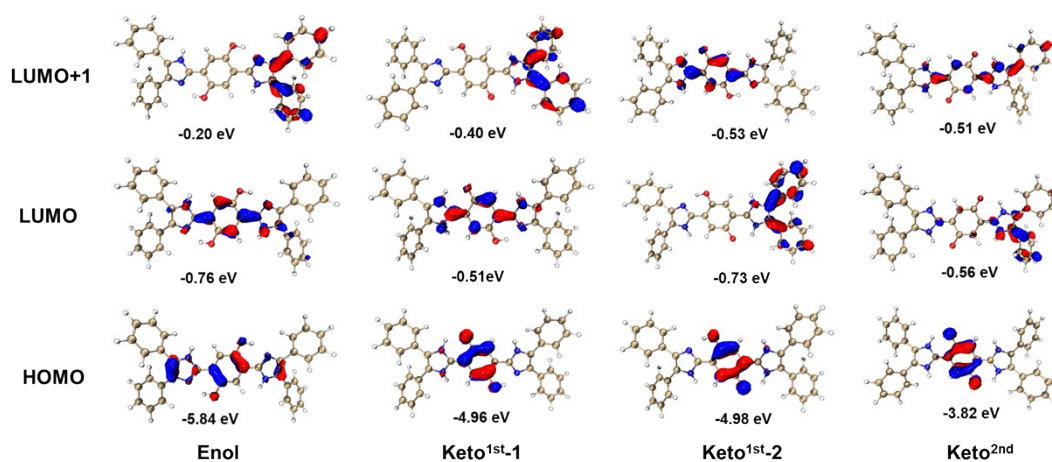

**Figure S7** The frontier molecular orbitals of the QM part of BDIBD-DMF.

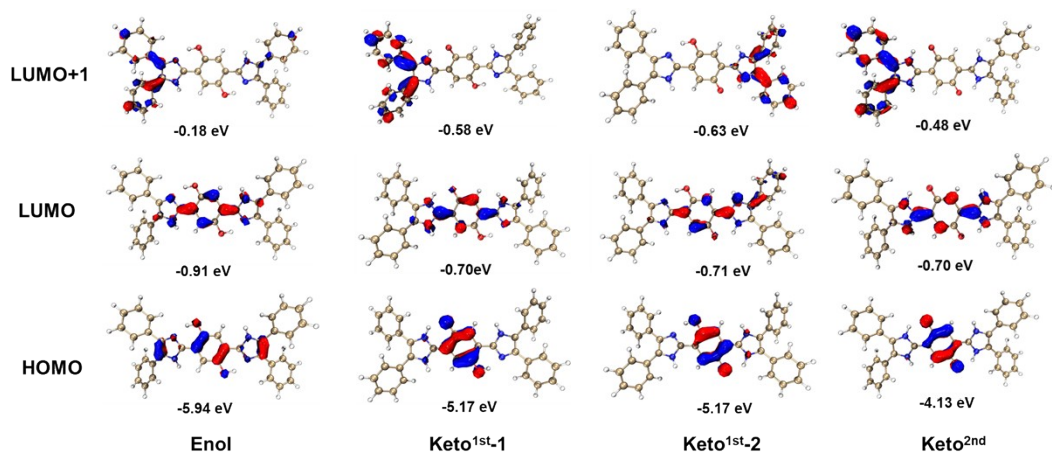

**Figure S8** The frontier molecular orbitals of the QM part of BDIBD-ACE.

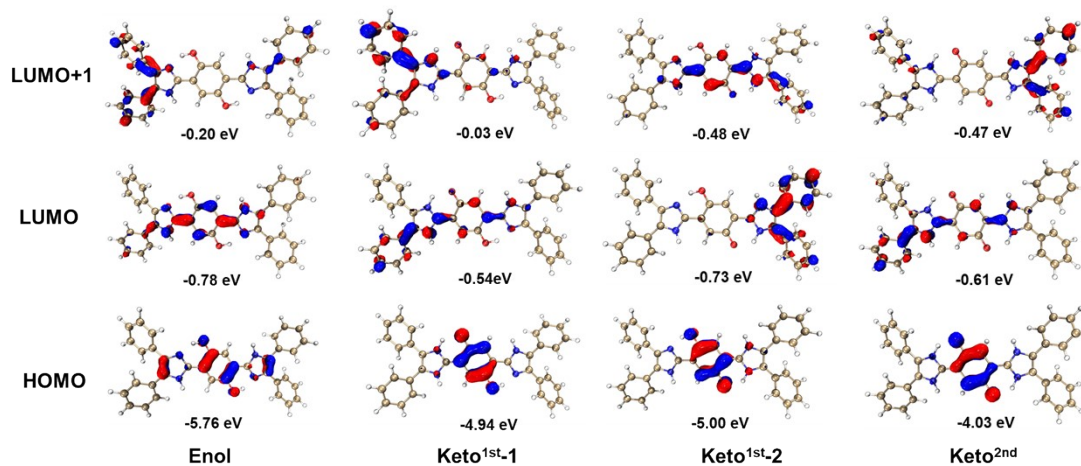

**Figure S9** The frontier molecular orbitals of the QM part of BDIBD-MeOH.

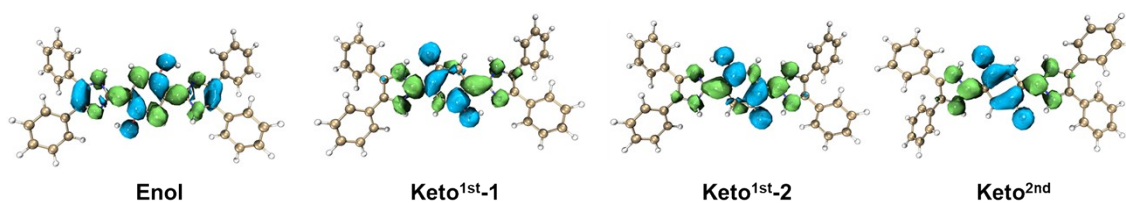

**Figure S10** Calculated charge-density difference (CCD) between  $S_0$  and  $S_1$  states of the QM part of BDIBD-ACE with the blue and the green regions denoting the hole and electron distributions, respectively.

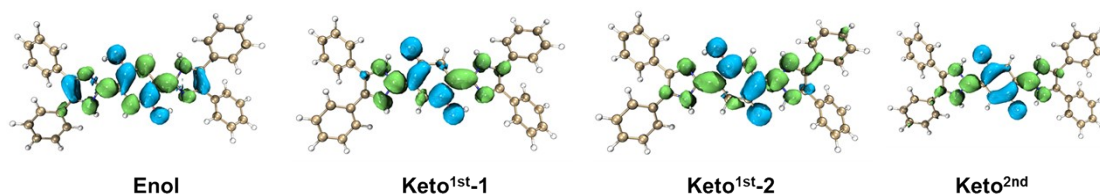

**Figure S11** Calculated charge-density difference (CCD) between  $S_0$  and  $S_1$  states of the QM part of BDIBD-MeOH with the blue and the green regions denoting the hole and electron distributions, respectively.

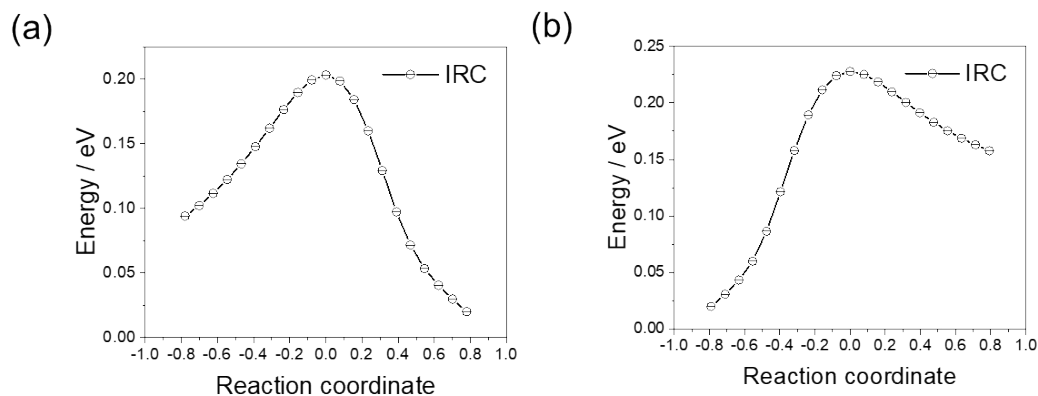

**Figure S12** Calculated relative energy profile along the excited state IRC for BDIBD-ACE based on ONIOM-EE(TD-M06-2X/6-31G(d,p):UFF) level. (a) Path from enol to keto<sup>1st</sup>; (b) Path from keto<sup>1st</sup> to keto<sup>2nd</sup>.

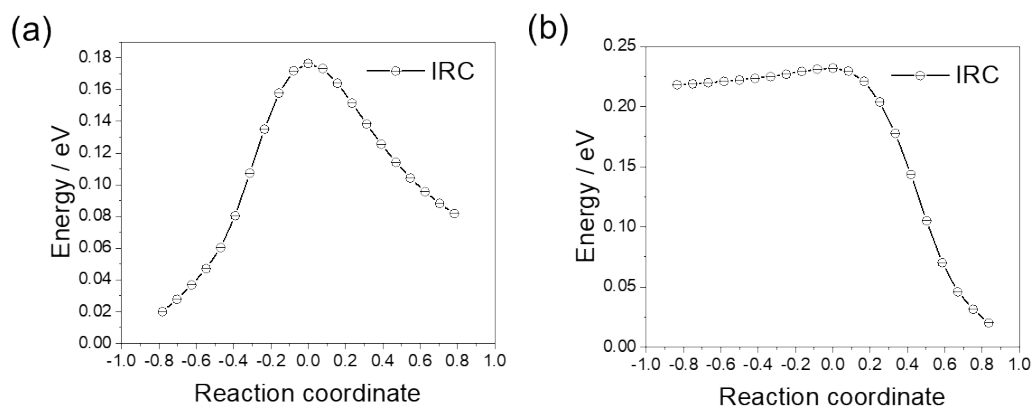

**Figure S13** Calculated relative energy profile along the excited state IRC for BDIBD-MeOH based on ONIOM-EE(TD-M06-2X/6-31G(d,p):UFF) level. (a) Path from enol to keto<sup>1st</sup>; (b) Path from keto<sup>1st</sup> to keto<sup>2nd</sup>.

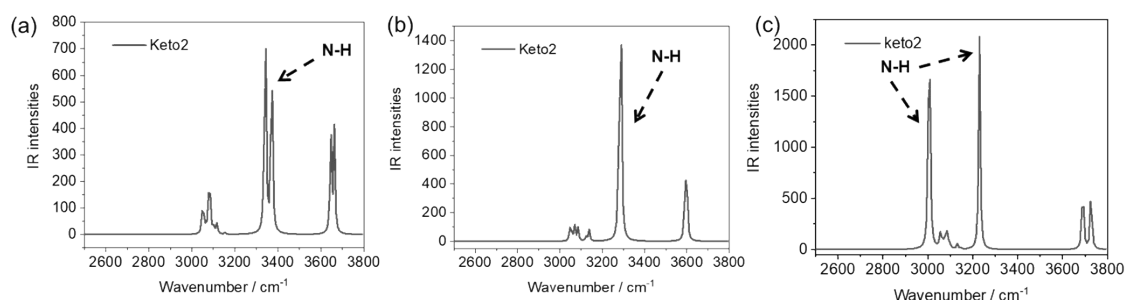

**Figure S14** Simulated IR vibrational spectra of N-H formed by proton transfer synergetic stretching mode for (a) BDIBD-DMF, (b) BDIBD-ACE and (c) BDIBD-MeOH compounds in S<sub>1</sub> state, respectively.

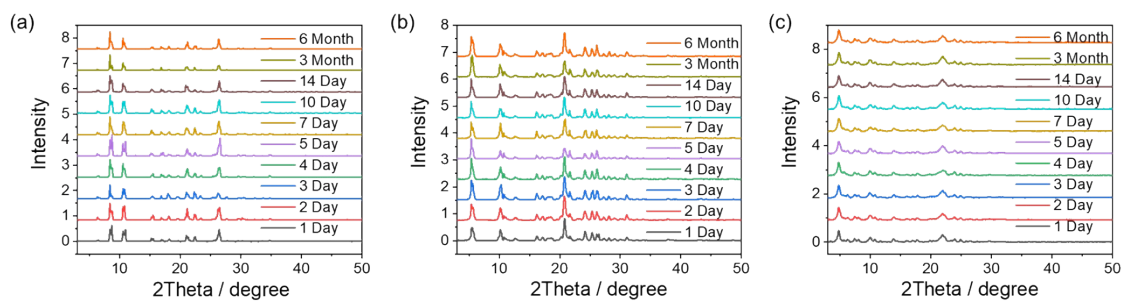

**Figure S15** Time-dependent powder X-ray diffraction pattern of (a) BDIBD-DMF, (b) BDIBD-ACE, (c) BDIBD-MeOH under ambient conditions.



**Table S1** Crystal data and structure refinement for crystals BDIBD-DMF, BDIBD-ACE and BDIBD-MeOH.

|                                    | BDIBD-DMF                                                      | BDIBD-ACE                                                      | BDIBD-MeOH                                                     |
|------------------------------------|----------------------------------------------------------------|----------------------------------------------------------------|----------------------------------------------------------------|
| Empirical formula                  | C <sub>21</sub> H <sub>20</sub> N <sub>3</sub> O <sub>2</sub>  | C <sub>21</sub> H <sub>19</sub> O <sub>2</sub> N <sub>2</sub>  | C <sub>39</sub> H <sub>38</sub> N <sub>4</sub> O <sub>5</sub>  |
| Formula weight                     | 346.40                                                         | 341.39                                                         | 628.71                                                         |
| Temperature/K                      | 240.00(10)                                                     | 249.96(13)                                                     | 250.00(10)                                                     |
| Crystal system                     | monoclinic                                                     | monoclinic                                                     | triclinic                                                      |
| Space group                        | <i>C2/c</i>                                                    | <i>C2/c</i>                                                    | <i>P-1</i>                                                     |
| a/Å                                | 33.779(8)                                                      | 34.052(3)                                                      | 9.7843(9)                                                      |
| b/Å                                | 5.9722(10)                                                     | 5.8249(6)                                                      | 11.0773(12)                                                    |
| c/Å                                | 17.985(4)                                                      | 17.723(2)                                                      | 15.682(2)                                                      |
| α/°                                | 90                                                             | 90                                                             | 99.283(10)                                                     |
| β/°                                | 103.99(3)                                                      | 102.677(10)                                                    | 95.760(9)                                                      |
| γ/°                                | 90                                                             | 90                                                             | 93.226(8)                                                      |
| Volume/Å <sup>3</sup>              | 3520.6(14)                                                     | 3429.7(6)                                                      | 1664.4(3)                                                      |
| Z                                  | 8                                                              | 8                                                              | 2                                                              |
| ρ <sub>calc</sub> /cm <sup>3</sup> | 1.307                                                          | 1.322                                                          | 1.255                                                          |
| μ/mm <sup>-1</sup>                 | 0.688                                                          | 0.667                                                          | 0.632                                                          |
| F(000)                             | 1464.0                                                         | 1440.0                                                         | 660.0                                                          |
| Radiation                          | Cu Kα (λ = 1.54184)                                            | Cu Kα (λ = 1.54184)                                            | Cu Kα (λ = 1.54184)                                            |
| 2θ range for data collection/°     | 10.138 to 147.008                                              | 10.232 to 101.578                                              | 8.11 to 101.1                                                  |
| Reflections collected              | 5531                                                           | 10121                                                          | 7876                                                           |
| Independent reflections            | 3385<br>R <sub>int</sub> = 0.0586, R <sub>sigma</sub> = 0.1028 | 1796<br>R <sub>int</sub> = 0.0537, R <sub>sigma</sub> = 0.0385 | 3462<br>R <sub>int</sub> = 0.0592, R <sub>sigma</sub> = 0.0881 |
| Data/restraints/parameter s        | 3385/0/238                                                     | 1796/0/230                                                     | 3462/0/447                                                     |
| Goodness-of-fit on F <sup>2</sup>  | 1.064                                                          | 1.067                                                          | 0.935                                                          |
| Final R indexes [I ≥ 2σ (I)]       | R1 = 0.0808, wR2 = 0.2058                                      | R1 = 0.0473, wR2 = 0.1225                                      | R1 = 0.0627, wR2 = 0.1602                                      |
| Final R indexes [all data]         | R1 = 0.1280, wR2 = 0.2675                                      | R1 = 0.0589, wR2 = 0.1355                                      | R1 = 0.0980, wR2 = 0.1988                                      |
| Diff. peak/hole/e Å <sup>-3</sup>  | 0.27/-0.35                                                     | 0.17/-0.22                                                     | 0.29/-0.27                                                     |

**Table S2** Selected bond lengths (Å) for molecules with estimated standard deviations (e.s.d.s.) in parentheses.

| BDIBD-DMF | BDIBD-ACE | BDIBD-MeOH |
|-----------|-----------|------------|
| N1-C15    | N11-C10   | N3-C1      |
| 1.358     | 1.352     | 1.355      |
| N2-C15    | N9-C10    | N5-C1      |
| 1.347     | 1.322     | 1.324      |
| N1-C7     | N11-C7    | N3-C11     |
| 1.389     | 1.381     | 1.386      |
| N2-C8     | N9-C8     | N3-C12     |
| 1.395     | 1.393     | 1.382      |
| C7-C8     | C7-C8     | C11-C12    |
| 1.376     | 1.368     | 1.377      |
| O1-N1     | O21-N9    | O1-N5      |
| 2.786     | 2.622     | 1.566      |

**Table S3** Selected bond angles (°) and dihedral angles (°) for molecules with estimated standard deviations (e.s.d.s.) in parentheses.

| BDIBD-DMF    | BDIBD-ACE   | BDIBD-MeOH     |
|--------------|-------------|----------------|
| N1-C15-N2    | N11-C10-N9  | N3-C1-N5       |
| 110.4        | 110.4       | 110.6          |
| C15-N1-C7    | C10-N11-C7  | C1-N3-C11      |
| 108.8        | 108.3       | 108.0          |
| C15-N2-C8    | C10-N9-C8   | C1-N5-C12      |
| 105.4        | 106.5       | 106.7          |
| N1-C7-C8     | N11-C7-C8   | N3-C11-C12     |
| 105.0        | 105.6       | 109.3          |
| N2-C8-C7     | N9-C8-C7    | N5-C12-C11     |
| 110.5        | 109.1       | 105.4          |
| N2-C8-C9-C14 | N9-C8-C1-C2 | N6-C16-C19-C13 |

---

|                |                 |                |
|----------------|-----------------|----------------|
| 26.1           | 23.8            | 34.7           |
| N2-C8-C9-C10   | N9-C8-C1-C6     | N6-C16-C19-C26 |
| -150.5         | -152.0          | -145.8         |
| N1-C7-C6-C5    | N11-C7-C12-C17  | N4-C12-C11-C20 |
| 133.3          | 135.6           | 141.987        |
| N1-C7-C6-C1    | N11-C7-C12-C13  | N4-C12-C11-C22 |
| -43.0          | -40.8           | -37.7          |
| N2-C15-C16-C18 | N11-C10-C18-C20 | N4-C4-C7-C8    |
| -12.5          | -13.8           | -4.5           |
| N1-C15-C16-C17 | N9-C10-C18-C19  | N4-C4-C7-C14   |
| 14.8           | 14.0            | 5.8            |

---

**Table S4** Bond lengths of O-H bond, O-N bond, intramolecular hydrogen bond and bond angles (°) in each ligand and coordination polymer.

| Sample     | O-H (Å) | O-N (Å) | O-H...N (Å) | O-H...N (°) |
|------------|---------|---------|-------------|-------------|
| BDIBD-DMF  | 0.820   | 2.643   | 1.916       | 147.262     |
| BDIBD-ACE  | 0.830   | 2.622   | 1.880       | 148.164     |
| BDIBD-MeOH | 0.830   | 2.566   | 1.820       | 148.709     |

**Table S5** Data summary of the decay lifetime for ESIPT crystals in solid state ( $\lambda_{\text{ex}} = 369.6$  nm).

| Lifetime / ns | BDIBD-DMF | BDIBD-ACE | BDIBD-MeOH |
|---------------|-----------|-----------|------------|
|               | 0.727     | 1.919     | 1.881      |

**Table S6** Data summary of photoluminescence quantum yield (PLQY) for ESIPT crystals in solid state.

| PLQY | BDIBD-DMF | BDIBD-ACE | BDIBD-MeOH |
|------|-----------|-----------|------------|
|      | 0.091     | 0.068     | 0.078      |

**Table S7** The relative Keto<sup>1st</sup> and Keto<sup>2ed</sup> energy (eV) of BDIBD-DMF calculated by different kind of functionals.

| Method         | Keto <sup>1st</sup> | Keto <sup>2ed</sup> |
|----------------|---------------------|---------------------|
| M06-2X         | 0.05                | 0.36                |
| CAM-B3LYP      | -0.03               | 0.16                |
| PBE0           | -0.43               | -0.22               |
| $\omega$ B97XD | -0.06               | 0.12                |

**Table S8** The relative Keto<sup>1st</sup> and Keto<sup>2ed</sup> energy (eV) of BDIBD-ACE calculated by different kind of functionals.

| Method         | Keto <sup>1st</sup> | Keto <sup>2ed</sup> |
|----------------|---------------------|---------------------|
| M06-2X         | 0.07                | 0.24                |
| CAM-B3LYP      | 0.01                | 0.07                |
| PBE0           | -0.33               | -0.26               |
| $\omega$ B97XD | -0.07               | 0.01                |

**Table S9** The relative Keto<sup>1st</sup> and Keto<sup>2ed</sup> energy (eV) of BDIBD-MeOH calculated by different kind of functionals.

| Method         | Keto <sup>1st</sup> | Keto <sup>2ed</sup> |
|----------------|---------------------|---------------------|
| M06-2X         | 0.05                | 0.29                |
| CAM-B3LYP      | -0.03               | 0.13                |
| PBE0           | -0.51               | -0.39               |
| $\omega$ B97XD | -0.06               | 0.08                |

**Table S10** The key geometry parameters and relative energies (nm) of BDIBD-DMF calculated by different kind of functionals.

| Method         | Absorbance | Emission |                       |                     |
|----------------|------------|----------|-----------------------|---------------------|
|                |            | Enol     | Keto <sup>1st-1</sup> | Keto <sup>2ed</sup> |
| Experiment     | 360        | -        | 536                   | -                   |
| M06-2X         | 324        | 378      | 494                   | 791                 |
| CAM-B3LYP      | 329        | 384      | 490                   | 719                 |
| PBE0           | 364        | 425      | 771                   | 1505                |
| $\omega$ B97XD | 326        | 379      | 487                   | 717                 |

**Table S11** The key geometry parameters and relative energies (nm) of BDIBD-ACE calculated by different kind of functionals.

| Method         | Absorbance | Emission |                       |                     |
|----------------|------------|----------|-----------------------|---------------------|
|                |            | Enol     | Keto <sup>1st-1</sup> | Keto <sup>2ed</sup> |
| Experiment     | 360        | -        | 522                   | 660                 |
| M06-2X         | 331        | 385      | 485                   | 725                 |
| CAM-B3LYP      | 331        | 385      | 490                   | 719                 |
| PBE0           | 338        | 385      | 771                   | 1505                |
| $\omega$ B97XD | 330        | 385      | 487                   | 717                 |

**Table S12** The key geometry parameters and relative energies (nm) of BDIBD-MeOH calculated by different kind of functionals.

| Method         | Absorbance | Emission |                       |                     |
|----------------|------------|----------|-----------------------|---------------------|
|                |            | Enol     | Keto <sup>1st-1</sup> | Keto <sup>2ed</sup> |
| Experiment     | 360        | -        | -                     | 636                 |
| M06-2X         | 340        | 390      | 482                   | 698                 |
| CAM-B3LYP      | 329        | 396      | 484                   | 692                 |
| PBE0           | 390        | 438      | 902                   | 1778                |
| $\omega$ B97XD | 342        | 391      | 481                   | 695                 |

**Table S13** Absorbance wavelengths and oscillator strength calculated for BDIBD-DMF.

| State          | Energy (eV) | Absorption (nm) | oscillator strength | Transition configuration                                                             |
|----------------|-------------|-----------------|---------------------|--------------------------------------------------------------------------------------|
| S <sub>1</sub> | 3.8241      | 324.22          | 1.1104              | H→L (75.3%)<br>H→L+1 (11.0%)<br>H-1→L (4.2%)                                         |
| S <sub>2</sub> | 4.3809      | 283.01          | 0.1723              | H→L+1 (40.0%)<br>H-2→L (25.4%)<br>H-1→L+1 (13.8%)<br>H→L (8.1%)<br>H-2→L+1 (6.8%)    |
| S <sub>3</sub> | 4.4735      | 277.15          | 0.1569              | H→L+2 (31.9%)<br>H-1→L (23.5%)<br>H-1→L+2 (9.4%)<br>H-2→L (8.9%)<br>H→L+1 (8.9%)     |
| S <sub>4</sub> | 4.6158      | 268.61          | 0.6321              | H→L+2 (37.8%)<br>H-2→L (16.0%)<br>H-1→L+2 (11.8%)<br>H-1→L (11.6%)<br>H-2→L+1 (8.6%) |

**Table S14** Emission wavelengths and oscillator strength calculated for BDIBD-DMF-enol.

| State          | Energy (eV) | Emission (nm) | oscillator strength | Transition configuration                                                                             |
|----------------|-------------|---------------|---------------------|------------------------------------------------------------------------------------------------------|
| S <sub>1</sub> | 3.2760      | 378.46        | 1.3010              | H→L (89.9%)<br>H→L+1 (2.5%)                                                                          |
| S <sub>2</sub> | 4.0531      | 305.90        | 0.1427              | H→L+1 (44.2%)<br>H-2→L (31.3%)<br>H-1→L+1 (12.0%)<br>H-2→L+1 (3.3%)<br>H→L (3.2%)                    |
| S <sub>3</sub> | 4.1205      | 300.89        | 0.1614              | H-1→L (32.3%)<br>H→L+1 (22.2%)<br>H-2→L (18.3%)<br>H→L+2 (11.0%)<br>H-2→L+1 (5.1%)<br>H-1→L+2 (3.6%) |
| S <sub>4</sub> | 4.2789      | 289.76        | 0.5068              | H→L+2 (64.2%)<br>H-1→L+2 (12.9%)<br>H-2→L (10.5%)                                                    |

H-2→L+1 (2.2%)

**Table S15** Emission wavelengths and oscillator strength calculated for BDIBD-DMF-keto<sup>1st</sup>.

| State          | Energy (eV) | Emission (nm) | oscillator strength | Transition configuration                                                              |
|----------------|-------------|---------------|---------------------|---------------------------------------------------------------------------------------|
| S <sub>1</sub> | 2.5091      | 494.14        | 0.4487              | H→L (94.6%)<br>H→L+2 (3.2%)                                                           |
| S <sub>2</sub> | 3.1728      | 390.77        | 0.0436              | H→L+1 (97.8%)                                                                         |
| S <sub>3</sub> | 3.7604      | 329.71        | 0.0139              | H→L+2 (88.0%)<br>H→L (3.8%)<br>H-3→L (3.5%)                                           |
| S <sub>4</sub> | 3.8369      | 323.14        | 0.0810              | H-3→L (64.9%)<br>H-2→L+2 (15.7%)<br>H→L+2 (5.3%)<br>H-3→L+2 (3.9%)<br>H-3→L+10 (2.3%) |

**Table S16** Emission wavelengths and oscillator strength calculated for BDIBD-DMF-keto<sup>2nd</sup>.

| State          | Energy (eV) | Emission (nm) | oscillator strength | Transition configuration     |
|----------------|-------------|---------------|---------------------|------------------------------|
| S <sub>1</sub> | 1.5678      | 790.83        | 0.2859              | H→L+1 (80.6%)<br>H→L (20.6%) |
| S <sub>2</sub> | 2.0036      | 618.80        | 0.0092              | H→L (78.9%)<br>H→L+1 (20.1%) |
| S <sub>3</sub> | 2.3518      | 527.19        | 0.0106              | H→L+2 (99.0%)                |
| S <sub>4</sub> | 2.9966      | 413.75        | 0.0006              | H→L+3 (99.4%)                |

**Table S17** Absorbance wavelengths and oscillator strength calculated for BDIBD-ACE.

| State          | Energy (eV) | Absorption (nm) | oscillator strength | Transition configuration                                                                             |
|----------------|-------------|-----------------|---------------------|------------------------------------------------------------------------------------------------------|
| S <sub>1</sub> | 3.7453      | 331.04          | 1.1506              | H→L (85.9%)<br>H-2→L (4.5%)<br>H→L+2 (3.1%)                                                          |
| S <sub>2</sub> | 4.4114      | 281.06          | 0.287               | H-2→L (36.5%)<br>H→L+2 (19.4%)<br>H-1→L+1 (18.0%)<br>H→L+1 (13.6%)<br>H→L (4.9%)                     |
| S <sub>3</sub> | 4.4244      | 280.23          | 0.0360              | H→L+1 (45.5%)<br>H-1→L+2 (16.7%)<br>H-1→L (14.4%)<br>H→L+2 (11.6%)<br>H-2→L+1 (3.9%)<br>H-2→L (3.8%) |
| S <sub>4</sub> | 4.5875      | 270.27          | 0.6419              | H-2→L (35.5%)<br>H→L+2 (33.1%)<br>H-1→L+1 (8.3%)<br>H-2→L+1 (7.2%)<br>H→L+9 (3.2%)                   |

**Table S18** Emission wavelengths and oscillator strength calculated for BDIBD-ACE-enol.

| State          | Energy (eV) | Emission (nm) | oscillator strength | Transition configuration                                                            |
|----------------|-------------|---------------|---------------------|-------------------------------------------------------------------------------------|
| S <sub>1</sub> | 3.2212      | 384.91        | 1.2949              | H→L (92.0%)<br>H-2→L (2.6%)                                                         |
| S <sub>2</sub> | 4.0838      | 303.60        | 0.2688              | H-2→L (66.8%)<br>H→L+2 (13.2%)<br>H-1→L+1 (7.2%)<br>H→L (3.1%)<br>H→L+9 (2.2%)      |
| S <sub>3</sub> | 4.1373      | 299.68        | 0.0035              | H→L+1 (65.9%)<br>H-1→L (12.9%)<br>H-1→L+2 (12.5%)<br>H-2→L+1 (3.1%)<br>H→L+2 (2.3%) |
| S <sub>4</sub> | 4.2620      | 290.91        | 0.5770              | H→L+2 (58.5%)<br>H-2→L (17.1%)                                                      |



H-1→L+1 (11.5%)  
H-2→L+2 (3.6%)

**Table S19** Emission wavelengths and oscillator strength calculated for BDIBD-ACE-keto<sup>1st</sup>.

| State          | Energy (eV) | Emission (nm) | oscillator strength | Transition configuration                                                             |
|----------------|-------------|---------------|---------------------|--------------------------------------------------------------------------------------|
| S <sub>1</sub> | 2.5573      | 484.82        | 0.4970              | H→L (90.7%)<br>H→L+1 (6.1%)                                                          |
| S <sub>2</sub> | 3.1962      | 387.91        | 0.0462              | H→L+1 (91.3%)<br>H→L (6.3%)                                                          |
| S <sub>3</sub> | 3.9485      | 314.00        | 0.1988              | H-3→L (58.7%)<br>H-1→L (10.6%)<br>H→L+2 (10.3%)<br>H-3→L+1 (5.8%)<br>H-3→L+10 (2.4%) |
| S <sub>4</sub> | 3.9890      | 310.81        | 0.3590              | H-1→L (43.3%)<br>H→L+2 (22.1%)<br>H-3→L (20.7%)<br>H-1→L+1 (2.5%)<br>H-1→L+2 (2.5%)  |

**Table S20** Emission wavelengths and oscillator strength calculated for BDIBD-ACE-keto<sup>2nd</sup>.

| State          | Energy (eV) | Emission (nm) | oscillator strength | Transition configuration      |
|----------------|-------------|---------------|---------------------|-------------------------------|
| S <sub>1</sub> | 1.7097      | 725.20        | 0.3215              | H→L (98.5%)                   |
| S <sub>2</sub> | 2.3901      | 518.74        | 0.0107              | H→L+1 (96.9%)                 |
| S <sub>3</sub> | 2.4428      | 507.55        | 0.0119              | H→L+2 (97.4%)                 |
| S <sub>4</sub> | 3.4330      | 361.16        | 0.0009              | H→L+3 (94.3%)<br>H→L+5 (3.1%) |

**Table S21** Absorbance wavelengths and oscillator strength calculated for BDIBD-MeOH.

| State          | Energy (eV) | Absorption (nm) | oscillator strength | Transition configuration                                                                                                             |
|----------------|-------------|-----------------|---------------------|--------------------------------------------------------------------------------------------------------------------------------------|
| S <sub>1</sub> | 3.6443      | 340.21          | 1.1679              | H→L (82.9%)<br>H→L+2 (5.4%)<br>H→L+1 (2.4%)                                                                                          |
| S <sub>2</sub> | 4.2218      | 293.68          | 0.1189              | H→L+1 (48.1%)<br>H-2→L (22.8%)<br>H-2→L+1 (8.9%)<br>H→L+2 (6.7%)<br>H→L (4.3%)<br>H-1→L+2 (2.9%)                                     |
| S <sub>3</sub> | 4.3008      | 288.28          | 0.2047              | H-1→L (26.2%)<br>H→L+2 (25.9%)<br>H→L+1 (15.1%)<br>H-1→L+1 (14.1%)<br>H-1→L+2 (5.3%)<br>H-2→L+2 (3.8%)<br>H-2→L (3.2%)<br>H→L (2.0%) |
| S <sub>4</sub> | 4.4948      | 275.84          | 0.6373              | H→L+2 (31.2%)<br>H-1→L (24.8%)<br>H-2→L (14.1%)<br>H-1→L+2 (12.9%)<br>H-2→L+1 (4.9%)<br>H→L+9 (2.7%)                                 |

**Table S22** Emission wavelengths and oscillator strength calculated for BDIBD-MeOH-enol.

| State          | Energy (eV) | Emission (nm) | oscillator strength | Transition configuration                                                                         |
|----------------|-------------|---------------|---------------------|--------------------------------------------------------------------------------------------------|
| S <sub>1</sub> | 3.1774      | 390.21        | 1.2338              | H→L (90.6%)<br>H→L+2 (2.6%)                                                                      |
| S <sub>2</sub> | 3.9712      | 312.21        | 0.1689              | H→L+1 (42.6%)<br>H-2→L (17.0%)<br>H-1→L (12.6%)<br>H→L+2 (10.1%)<br>H-2→L+1 (8.7%)<br>H→L (2.8%) |
| S <sub>3</sub> | 4.0342      | 307.33        | 0.2050              | H-1→L (39.6%)<br>H→L+1 (31.9%)<br>H→L+2 (10.3%)<br>H-2→L+1 (5.8%)<br>H-1→L+1 (5.4%)              |
| S <sub>4</sub> | 4.1961      | 295.48        | 0.5468              | H→L+2 (53.6%)<br>H-1→L (19.1%)<br>H-1→L+2 (9.9%)<br>H-2→L (5.5%)<br>H-2→L+1 (4.8%)               |

**Table S23** Emission wavelengths and oscillator strength calculated for BDIBD-MeOH-keto<sup>1st</sup>.

| State          | Energy (eV) | Emission (nm) | oscillator strength | Transition configuration                     |
|----------------|-------------|---------------|---------------------|----------------------------------------------|
| S <sub>1</sub> | 2.4969      | 496.55        | 0.5047              | H→L (63.3%)<br>H→L+1 (30.9%)<br>H→L+2 (4.0%) |
| S <sub>2</sub> | 3.0284      | 409.41        | 0.0344              | H→L+1 (64.7%)<br>H→L (32.9%)                 |
| S <sub>3</sub> | 3.6811      | 336.81        | 0.0245              | H→L+2 (90.7%)<br>H→L+1 (2.1%)<br>H→L (2.0%)  |
| S <sub>4</sub> | 3.9551      | 313.48        | 1.0498              | H-1→L (58.7%)<br>H-1→L+1 (28.8%)             |

**Table S24** Emission wavelengths and oscillator strength calculated for BDIBD-MeOH-keto<sup>2nd</sup>.

| State          | Energy (eV) | Emission (nm) | oscillator strength | Transition configuration                      |
|----------------|-------------|---------------|---------------------|-----------------------------------------------|
| S <sub>1</sub> | 1.7766      | 697.89        | 0.3352              | H→L (67.3%)<br>H→L+2 (27.6%)<br>H→L+1 (5.5%)  |
| S <sub>2</sub> | 2.2689      | 546.45        | 0.0093              | H→L+1 (38.9%)<br>H→L+2 (31.2%)<br>H→L (28.8%) |
| S <sub>3</sub> | 2.3559      | 526.27        | 0.0101              | H→L+1 (54.7%)<br>H→L+2 (40.4%)<br>H→L (3.9%)  |
| S <sub>4</sub> | 3.3327      | 372.02        | 0.0010              | H→L+3 (98.5%)                                 |

**Table S25** Calculated HOMO, LUMO energy of BDIBD-DMF.

|                     | Energy (eV) |         |         |         |
|---------------------|-------------|---------|---------|---------|
|                     | LUMO        | LUMO+1  | LUMO+2  | LUMO+3  |
| enol                | -0.7563     | -0.2032 | 0.1365  | 0.4630  |
| keto <sup>1st</sup> | -0.5062     | -0.3977 | 0.0153  | 0.4692  |
| keto <sup>2nd</sup> | -0.5601     | -0.5124 | -0.2489 | 0.2774  |
|                     | HOMO        | HOMO-1  | HOMO-2  | HOMO-3  |
| enol                | -5.8423     | -6.7445 | -6.9207 | -7.9517 |
| keto <sup>1st</sup> | -4.9356     | -6.3558 | -7.0562 | -7.2106 |
| keto <sup>2nd</sup> | -3.8222     | -6.4088 | -6.6014 | -6.7755 |

**Table S26** Calculated HOMO, LUMO energy of BDIBD-ACE.

|                     | Energy (eV) |         |         |         |
|---------------------|-------------|---------|---------|---------|
|                     | LUMO        | LUMO+1  | LUMO+2  | LUMO+3  |
| enol                | -0.9087     | -0.1834 | -0.0628 | 0.5923  |
| keto <sup>1st</sup> | -0.7037     | -0.5808 | 0.0354  | 0.2971  |
| keto <sup>2nd</sup> | -0.6983     | -0.4820 | -0.4357 | 0.3812  |
|                     | HOMO        | HOMO-1  | HOMO-2  | HOMO-3  |
| enol                | -5.9434     | -6.8778 | -7.0072 | -8.1234 |
| keto <sup>1st</sup> | -5.1702     | -6.4379 | -7.2151 | -7.5308 |
| keto <sup>2nd</sup> | -4.1316     | -6.5866 | -6.9411 | -7.0009 |

**Table S27** Calculated HOMO, LUMO energy of BDIBD-MeOH.

|                     | Energy (eV) |         |         |         |
|---------------------|-------------|---------|---------|---------|
|                     | LUMO        | LUMO+1  | LUMO+2  | LUMO+3  |
| enol                | -0.7782     | -0.1994 | -0.0219 | 0.5873  |
| keto <sup>1st</sup> | -0.5400     | -0.0273 | 0.2910  | 0.6806  |
| keto <sup>2nd</sup> | -0.6096     | -0.4708 | -0.3975 | 0.3958  |
|                     | HOMO        | HOMO-1  | HOMO-2  | HOMO-3  |
| enol                | -5.7603     | -6.7173 | -6.8371 | -8.1244 |
| keto <sup>1st</sup> | -4.9382     | -6.3347 | -7.0592 | -7.4584 |
| keto <sup>2nd</sup> | -4.0268     | -6.4386 | -6.8091 | -6.8925 |

**Table S28** Calculated HOMO-LUMO gap of the crystals.

| HOMO-LUMO gap / eV  | BDIBD-DMF | BDIBD- ACE | BDIBD-MeOH |
|---------------------|-----------|------------|------------|
| enol                | 5.0859    | 5.0347     | 4.9820     |
| keto <sup>1st</sup> | 4.4294    | 4.4665     | 4.3050     |
| keto <sup>2nd</sup> | 3.2621    | 3.4333     | 3.4172     |

**Table S29** Calculated HOMO-LUMO+1 gap of the crystals.

| HOMO-LUMO+1 gap / eV | BDIBD-DMF | BDIBD- ACE | BDIBD-MeOH |
|----------------------|-----------|------------|------------|
| enol                 | 5.6391    | 5.7600     | 5.5609     |
| keto <sup>1st</sup>  | 4.5379    | 4.5894     | 4.9109     |
| keto <sup>2nd</sup>  | 3.3098    | 3.6496     | 3.5560     |

**Table S30** Calculated bond lengths (Å) of BDIBD-DMF, BDIBD-ACE, BDIBD-MeOH on  $S_0$  configuration.

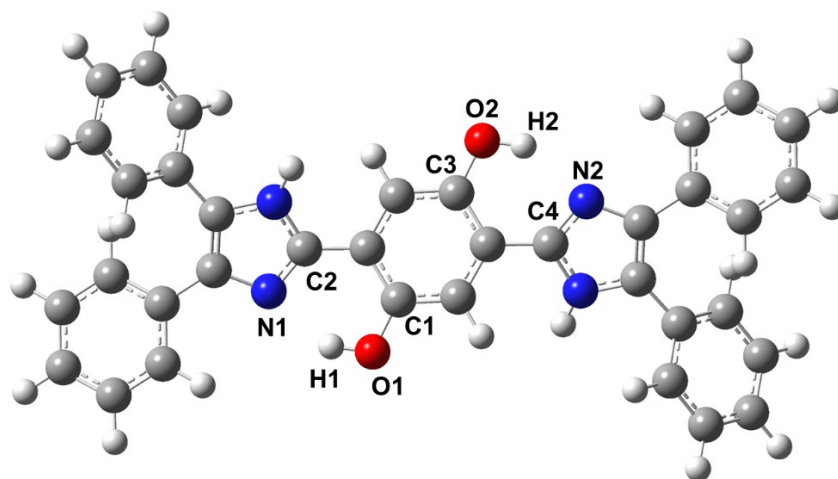

|       | BDIBD-DMF | BDIBD-ACE | BDIBD-MeOH |
|-------|-----------|-----------|------------|
| O1-H1 | 0.9757    | 0.9793    | 0.9854     |
| O1-C1 | 1.354     | 1.351     | 1.356      |
| N1-H1 | 1.972     | 1.857     | 1.775      |
| N1-C2 | 1.324     | 1.323     | 1.323      |
| O1-N1 | 2.833     | 2.730     | 2.664      |
| O2-H2 | 0.9745    | 0.9790    | 0.9847     |
| O2-C3 | 1.361     | 1.351     | 1.338      |
| N2-H2 | 1.983     | 1.859     | 1.731      |
| N2-C4 | 1.325     | 1.323     | 1.326      |
| O2-N2 | 2.842     | 2.728     | 2.619      |

**Table S31** Calculated Mayer bond order of BDIBD-DMF, BDIBD-ACE, BDIBD-MeOH on  $S_0$  configuration.

|       | BDIBD-DMF | BDIBD-ACE | BDIBD-MeOH |
|-------|-----------|-----------|------------|
| O1-H1 | 0.97571   | 0.7693    | 0.7517     |
| O1-C1 | 1.35425   | 0.9861    | 0.9737     |
| N1-H1 | 1.97197   | 0.1138    | 0.1384     |
| N1-C2 | 1.32447   | 1.3435    | 1.3206     |
| O2-H2 | 0.97449   | 0.7706    | 0.7517     |
| O2-C3 | 1.36148   | 0.9850    | 1.0385     |
| N2-H2 | 1.98329   | 0.0506    | 0.1370     |
| N2-C4 | 1.32462   | 1.3442    | 1.3093     |

**Table S32** Calculated bond lengths (Å) of BDIBD-DMF, BDIBD-ACE, BDIBD-MeOH on S<sub>1</sub> configuration.

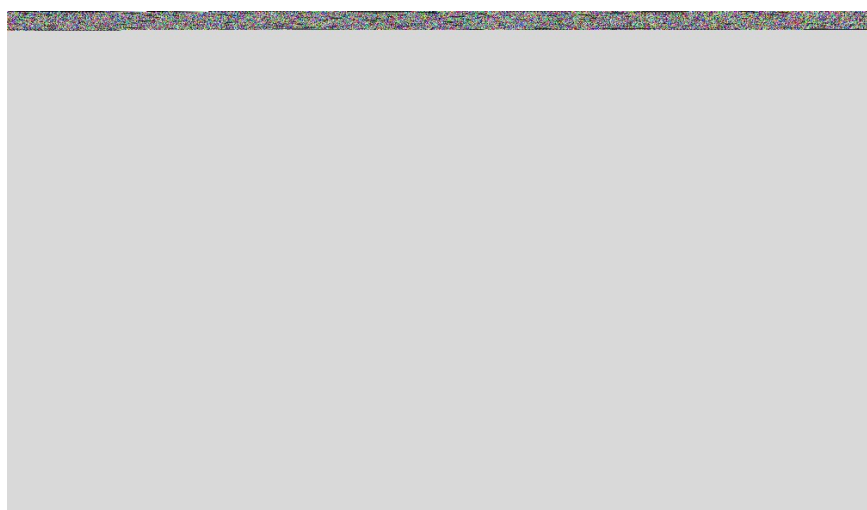

|       | BDIBD-DMF | BDIBD-ACE | BDIBD-MeOH |
|-------|-----------|-----------|------------|
| O1-H1 | 0.9834    | 0.9917    | 1.003      |
| O1-C1 | 1.339     | 1.334     | 1.335      |
| N1-H1 | 1.878     | 1.760     | 1.679      |
| N1-C2 | 1.350     | 1.348     | 1.346      |
| O1-N1 | 2.763     | 2.660     | 2.601      |
| O2-H2 | 0.9828    | 0.9916    | 1.002      |
| O2-C3 | 1.340     | 1.335     | 1.321      |
| N2-H2 | 1.878     | 1.759     | 1.653      |
| N2-C4 | 1.350     | 1.348     | 1.350      |
| O2-N2 | 2.764     | 2.660     | 2.571      |

**Table S33** Calculated Mayer bond order of BDIBD-DMF, BDIBD-ACE, BDIBD-MeOH on S<sub>1</sub> configuration.

|       | BDIBD-DMF | BDIBD-ACE | BDIBD-MeOH |
|-------|-----------|-----------|------------|
| O1-H1 | 0.98340   | 0.7454    | 0.7224     |
| O1-C1 | 1.33888   | 0.9993    | 0.9909     |
| N1-H1 | 0.23046   | 0.1328    | 0.1601     |
| N1-C2 | 1.34956   | 1.2946    | 1.2796     |
| O2-H2 | 0.98278   | 0.7462    | 0.7231     |
| O2-C3 | 1.33977   | 0.9983    | 1.0509     |
| N2-H2 | 1.87838   | 0.1327    | 0.1560     |
| N2-C4 | 1.35015   | 1.2957    | 1.2673     |

**Table S34** Calculated bond lengths (Å) of BDIBD-DMF-keto<sup>1st</sup>, BDIBD-ACE- keto<sup>1st</sup>, BDIBD-MeOH-keto<sup>1st</sup> on S<sub>1</sub> configuration.

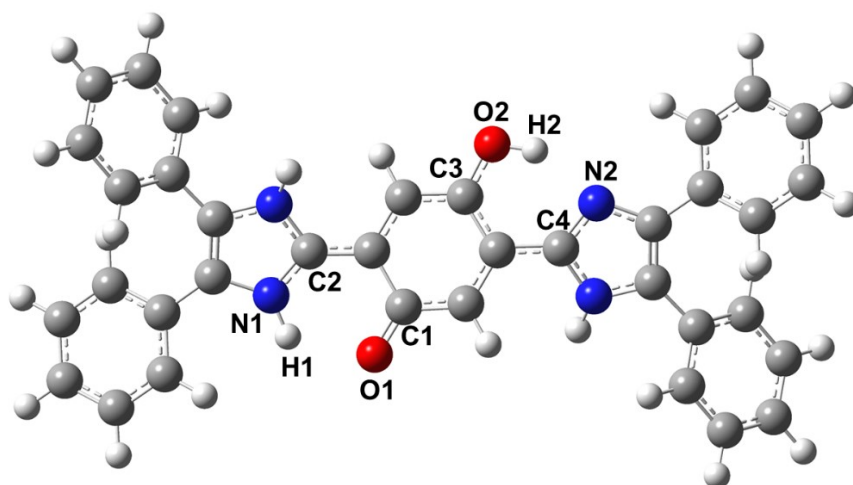

|       | BDIBD-DMF | BDIBD-ACE | BDIBD-MeOH |
|-------|-----------|-----------|------------|
| O1-H1 | 2.069     | 1.927     | 1.864      |
| O1-C1 | 1.264     | 1.265     | 1.270      |
| N1-H1 | 1.017     | 1.021     | 1.023      |
| N1-C2 | 1.364     | 1.361     | 1.357      |
| O1-N1 | 2.725     | 2.647     | 2.627      |
| O2-H2 | 0.9847    | 0.9961    | 1.006      |
| O2-C3 | 1.338     | 1.332     | 1.320      |
| N2-H2 | 1.870     | 1.739     | 1.637      |
| N2-C4 | 1.337     | 1.336     | 1.340      |
| O2-N2 | 2.757     | 2.646     | 2.559      |

**Table S35** Calculated Mayer bond order of BDIBD-DMF-keto<sup>1st</sup>, BDIBD-ACE-keto<sup>1st</sup>, BDIBD-MeOH-keto<sup>1st</sup> on S<sub>1</sub> configuration.

|       | BDIBD-DMF | BDIBD-ACE | BDIBD-MeOH |
|-------|-----------|-----------|------------|
| O1-H1 | 2.06859   | 0.1261    | 0.1417     |
| O1-C1 | 1.26420   | 1.4342    | 1.3920     |
| N1-H1 | 1.01687   | 0.7815    | 0.7710     |
| N1-C2 | 1.36440   | 1.1395    | 1.1469     |
| O2-H2 | 0.98470   | 0.7479    | 0.7256     |
| O2-C3 | 1.33783   | 0.9773    | 1.0278     |
| N2-H2 | 1.87039   | 0.1326    | 0.1540     |
| N2-C4 | 1.33716   | 1.3111    | 1.2833     |



**Table S36** Calculated bond lengths (Å) of BDIBD-DMF-keto<sup>2nd</sup>, BDIBD-ACE-keto<sup>2nd</sup>, BDIBD-MeOH-keto<sup>2nd</sup> on S1 configuration.

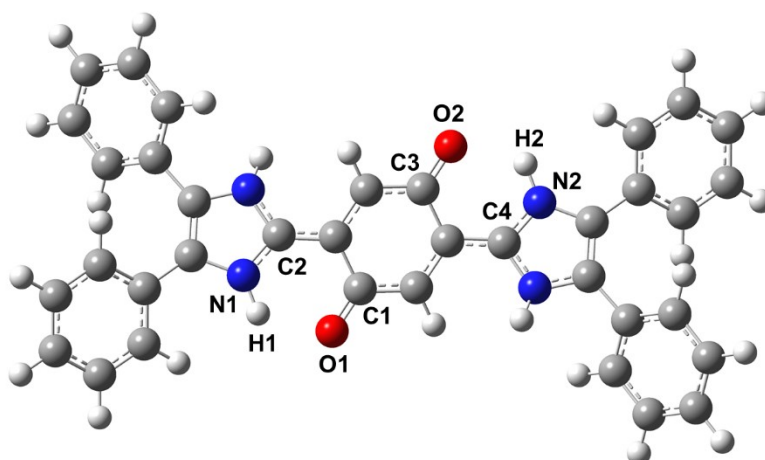

|       | BDIBD-DMF | BDIBD-ACE | BDIBD-MeOH |
|-------|-----------|-----------|------------|
| O1-H1 | 2.023     | 1.893     | 1.828      |
| O1-C1 | 1.265     | 1.267     | 1.272      |
| N1-H1 | 1.017     | 1.022     | 1.025      |
| N1-C2 | 1.361     | 1.358     | 1.355      |
| O1-N1 | 2.702     | 2.633     | 2.609      |
| O2-H2 | 1.998     | 1.889     | 1.698      |
| O2-C3 | 1.266     | 1.267     | 1.266      |
| N2-H2 | 1.020     | 1.023     | 1.041      |
| N2-C4 | 1.364     | 1.358     | 1.357      |
| O2-N2 | 2.692     | 2.632     | 2.529      |

**Table S37** Calculated Mayer bond order of BDIBD-DMF- keto<sup>2nd</sup>, BDIBD-ACE-keto<sup>2nd</sup>, BDIBD-MeOH-keto<sup>2nd</sup> on S1 configuration.

|       | BDIBD-DMF | BDIBD-ACE | BDIBD-MeOH |
|-------|-----------|-----------|------------|
| O1-H1 | 2.02308   | 0.1457    | 0.1620     |
| O1-C1 | 1.26517   | 1.3856    | 1.3445     |
| N1-H1 | 1.01727   | 0.7679    | 0.7551     |
| N1-C2 | 1.36128   | 1.0827    | 0.9858     |
| O2-H2 | 1.99779   | 0.1461    | 0.1893     |
| O2-C3 | 1.26620   | 1.3856    | 1.3630     |
| N2-H2 | 1.01945   | 0.7663    | 0.7120     |
| N2-C4 | 1.36390   | 1.1457    | 1.1509     |

**Table S38** Calculated stretching vibration wavenumber (cm<sup>-1</sup>) of O–H and N–H formed by proton transfer for BDIBD-DMF, BDIBD-ACE and BDIBD-MeOH in both S<sub>0</sub> and S<sub>1</sub> states.

|                                        |     | BDIBD-DMF | BDIBD-ACE | BDIBD-MeOH |
|----------------------------------------|-----|-----------|-----------|------------|
| S <sub>0</sub>                         | O-H | 3467      | 3370      | 3215       |
|                                        |     | 3491      | 3379      | 3225       |
| S <sub>1</sub> -enol                   | O-H | 3274      | 3081      | 2887       |
|                                        |     | 3292      | 3098      | 2909       |
| S <sub>1</sub> -keto <sup>1st</sup> -1 | O-H | 3267      | 3027      | 2861       |
|                                        | N-H | 3377      | 3312      | 3260       |
| S <sub>1</sub> -keto <sup>1st</sup> -2 | O-H | 3230      | 3022      | 2848       |
|                                        | N-H | 3345      | 3304      | 3112       |
| S <sub>1</sub> -keto <sup>2nd</sup>    | O-H | 3371      | 3279      | 3006       |
|                                        |     | 3341      | 3288      | 3230       |

**Table S39** Calculated density of all electrons  $\rho(\text{BCP})$ , potential energy density  $V(\text{BCP})$  and hydrogen bond energy  $E_{\text{HB}}$  of hydrogen bond of BDIBD-DMF, BDIBD-ACE and BDIBD-MeOH in both S<sub>0</sub> and S<sub>1</sub> states.

|                     |                                     | $\rho(\text{BCP}) /$<br>a.u. | $V(\text{BCP}) /$<br>a.u. | $E_{\text{HB}} / \text{kcal mol}^{-1}$ |
|---------------------|-------------------------------------|------------------------------|---------------------------|----------------------------------------|
| BDIBD-DMF           | Enol-S <sub>0</sub>                 | 0.0269                       | -0.0202                   | -5.27                                  |
|                     |                                     | 0.0262                       | -0.0197                   | -5.11                                  |
|                     | Enol-S <sub>1</sub>                 | 0.0330                       | -0.0244                   | -6.63                                  |
|                     |                                     | 0.0330                       | -0.0244                   | -6.61                                  |
| BDIBD- ACE          | Keto <sup>1st</sup> -S <sub>1</sub> | 0.0337                       | -0.0336                   | -6.77                                  |
|                     |                                     | 0.0350                       | -0.0265                   | -7.06                                  |
|                     | Enol-S <sub>0</sub>                 | 0.0348                       | -0.0264                   | -7.03                                  |
|                     |                                     | 0.0441                       | -0.0336                   | -9.09                                  |
| BDIBD- MeOH         | Enol-S <sub>1</sub>                 | 0.0441                       | -0.0337                   | -9.11                                  |
|                     |                                     | 0.0465                       | -0.0358                   | -9.63                                  |
|                     | Keto <sup>1st</sup> -S <sub>1</sub> | 0.0426                       | -0.0328                   | -8.77                                  |
|                     |                                     | 0.0474                       | -0.0379                   | -9.83                                  |
| Enol-S <sub>1</sub> | 0.0541                              | -0.0434                      | -11.3                     |                                        |
|                     | 0.0577                              | -0.0481                      | -12.1                     |                                        |
|                     | 0.0602                              | -0.0511                      | -12.7                     |                                        |

\*The relationship between hydrogen bond energy  $E_{\text{HB}}$  and potential energy density at corresponding BCP can be approximately described as:

$$E_{\text{HB}} = -223.08 * \rho(\text{BCP}) + 0.7423$$
